# Supplementary material
Source: Springer Nature journal article supplement (https://www.springermedizin.de/resource/supplementary/13063_2012_1216_MOESM2_ESM.pdf/9619982)

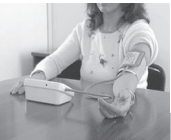

# The MOREPRESS<sup>®</sup> HBPT web-based system

Patient at home

(A&D UA-767PC, automatic, electronic, oscillometric, upper arm blood pressure monitor)

Serial cable

GPRS wireless interface (BluMed)

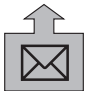

GPRS

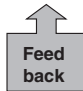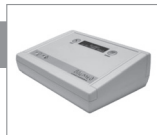

https protocol (SSL certification)

webserver

https protocol (SSL certification)

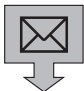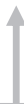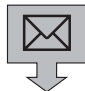

Investigator

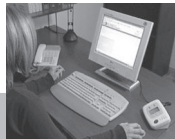

Supplement: MOESM2 [file 9619982]
